# Supplementary material for: Study protocol for a randomised controlled trial of brief, habit-based, lifestyle advice for cancer survivors: exploring behavioural outcomes for the Advancing Survivorship Cancer Outcomes Trial (ASCOT)
Source: PubMed Central journal article supplement — BMJ Open. 2016 Nov 23;6(11):e011646. doi: 10.1136/bmjopen-2016-011646 (PMC5178807; doi:10.1136/bmjopen-2016-011646), 2016-11-23
Supplement: bmjopen-2016-011646supp_2.pdf [file bmjopen-2016-011646supp_2.pdf]

# Healthy life action plan

**Your goal:** (eg. Eat more fruit & veg) \_\_\_\_\_

**New everyday habit:** (eg. Eat an apple after lunch) \_\_\_\_\_

## Steps to support your new habit:

**Step 1:** (eg. Buy 7 apples every week) \_\_\_\_\_ **Step 2:** \_\_\_\_\_ **Step 3:** \_\_\_\_\_

## Your progress

Tick for everytime you do your new behaviour - 60 times makes it a habit!

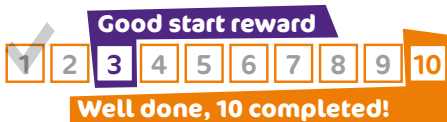

Good start reward: \_\_\_\_\_

1<sup>st</sup> reward: \_\_\_\_\_

How do you feel? \_\_\_\_\_

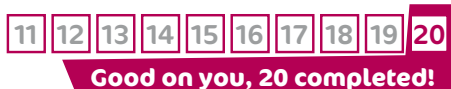

2<sup>nd</sup> reward: \_\_\_\_\_

How do you feel? \_\_\_\_\_

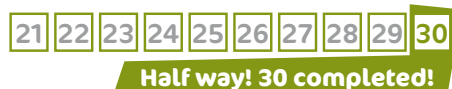

3<sup>rd</sup> reward: \_\_\_\_\_

How do you feel? \_\_\_\_\_

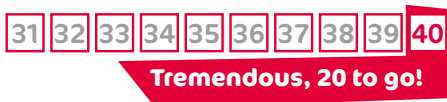

4<sup>th</sup> reward: \_\_\_\_\_

How do you feel? \_\_\_\_\_

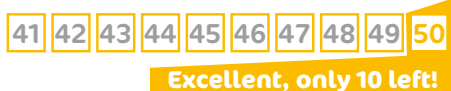

5<sup>th</sup> reward: \_\_\_\_\_

How do you feel? \_\_\_\_\_

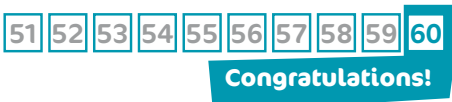

6<sup>th</sup> reward: \_\_\_\_\_

How do you feel? \_\_\_\_\_

## **i** Don't worry if you slip up

We all forget things sometimes so don't worry if you miss a day or two, keep going because you haven't failed.
