# Supplementary material for: Study protocol for a randomised controlled trial of brief, habit-based, lifestyle advice for cancer survivors: exploring behavioural outcomes for the Advancing Survivorship Cancer Outcomes Trial (ASCOT)
Source: PubMed Central journal article supplement — BMJ Open. 2016 Nov 23;6(11):e011646. doi: 10.1136/bmjopen-2016-011646 (PMC5178807; doi:10.1136/bmjopen-2016-011646), 2016-11-23
Supplement: bmjopen-2016-011646supp_4.pdf [file bmjopen-2016-011646supp_4.pdf]

ASCOT: lifestyle study for cancer survivors

020 7679 1809
